# Supplementary material for: Sex Differences in Aggression Are Paralleled by Differential Activation of the Brain Social Decision-Making Network in Zebrafish
Source: PubMed Central journal article supplement (PMC8890505; doi:10.3389/fnbeh.2022.784835), 2022-02-16
Supplement: Data_Sheet_1.pdf [file Data_Sheet_1.pdf]

## SUPPLEMENTARY MATERIAL

Scaia, M.F., Akinrinade, I., & Oliveira, R.F. (2021). Sex-differences in aggression are paralleled by differential activation of the brain social decision-making network in zebrafish.

*Frontiers in Behavioral Neuroscience.*

### SUPPLEMENTARY FIGURE

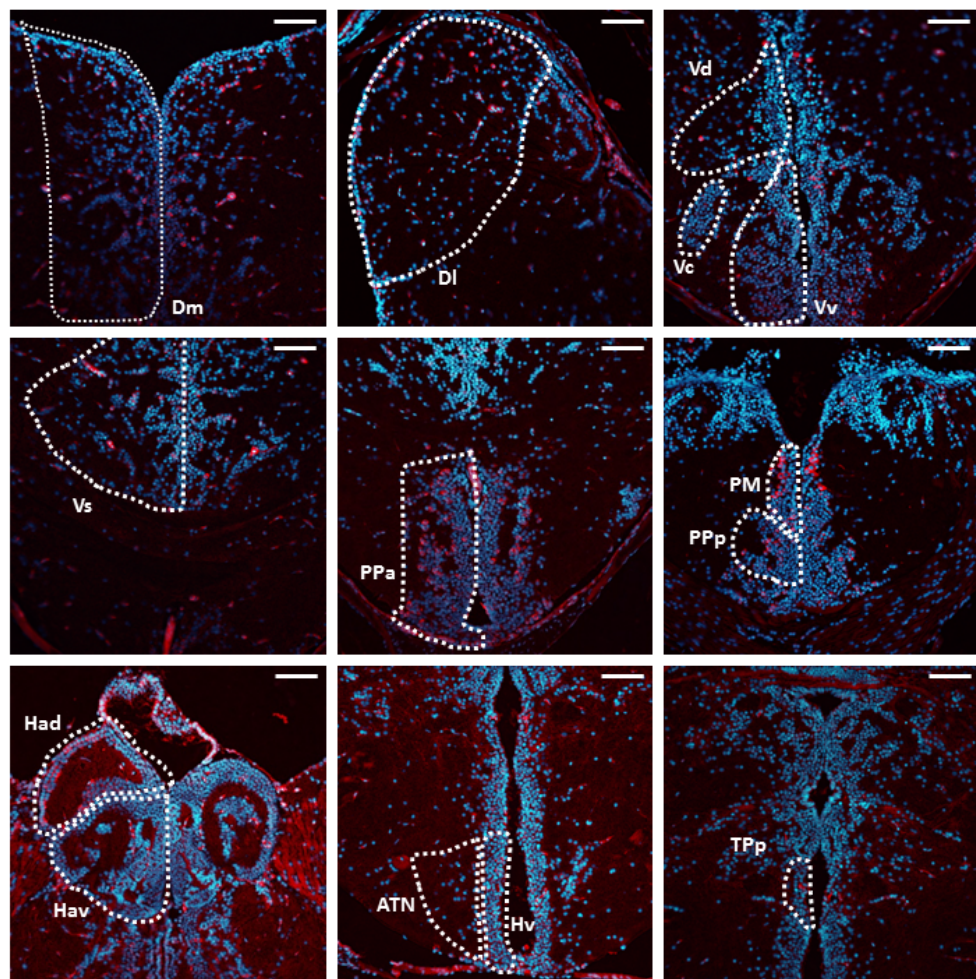

*Figure S1: Location of brain regions from the SDMN in which brain activation was determined. Red staining indicates pS6 immunopositive cells, and blue staining correspond to DAPI. Abbreviations: ATN: anterior tuberal nucleus; Dl: lateral zone of the dorsal telencephalon; Dm: medial zone of the dorsal telencephalon; Had: dorsal habenula; Hav: ventral habenula ; Hv: ventral zone of periventricular hypothalamus; PPa: anterior part of the*

*parvocellular preoptic area; Ppp: posterior part of the parvocellular preoptic area; PM: magnocellular preoptic area; TPp: periventricular nucleus of the posterior tuberculum; Vd: dorsal nucleus of the ventral telencephalon; Vc: central nucleus of the ventral telencephalon; Vs: supracommissural nucleus of the ventral telencephalon; Vv: ventral nucleus of the ventral telencephalon. Scale bars represent 100µm.*

## SUPPLEMENTARY TABLE

*Table S1. Ranking of eigen centralities of each node of the SDMN for males and females of each social treatment.*

| <b>Female Control</b> | <b>Female Loser</b> | <b>Female Winner</b> | <b>Male Control</b> | <b>Male Loser</b> | <b>Male Winner</b> |
|-----------------------|---------------------|----------------------|---------------------|-------------------|--------------------|
| Ppa l                 | aTn (VMH)           | Ppa m                | Vv p                | Vv p              | PM                 |
| PM                    | Had                 | Vd p                 | Vv a                | TPp (VTA)         | Dm m               |
| DI -                  | Vv a                | vTn (AH) HV          | Ppa m               | Hav               | Ppa l              |
| Vd p                  | Vs                  | TPp (VTA)            | Ppa l               | Had               | Vs                 |
| Dm l                  | Hav                 | Vd a                 | TPp (VTA)           | Dm -              | TPp (VTA)          |
| aTn (VMH)             | Vd a                | Vv p                 | PM                  | aTn (VMH)         | DI -               |
| Vc                    | Vd p                | Vs                   | vTn (AH) HV         | PM                | Vd a               |
| Vv a                  | TPp (VTA)           | Vv a                 | Dm m                | PPp               | vTn (AH) HV        |
| vTn (AH) HV           | Vc                  | PPp                  | PPp                 | Vc                | Hav                |
| Vv p                  | DI -                | Hav                  | DI -                | DI -              | Dm -               |
| Had                   | PPp                 | DI -                 | Dm -                | Ppa m             | Vd p               |
| Vd a                  | Vv p                | aTn (VMH)            | Hav                 | Vd a              | PPp                |
| Ppa m                 | Dm l                | Had                  | Had                 | Vv a              | Vv p               |
| Hav                   | Ppa m               | Dm -                 | Dm l                | Dm m              | Dm l               |
| Dm m                  | Dm m                | PM                   | Vd a                | Ppa l             | Vv a               |
| Dm -                  | vTn (AH) HV         | Ppa l                | Vs                  | Vs                | Had                |
| PPp                   | Ppa l               | Dm m                 | aTn (VMH)           | Vd p              | Vc                 |
| Vs                    | Dm -                | Vc                   | Vd p                | Dm l              | aTn (VMH)          |
| TPp (VTA)             | PM                  | Dm l                 | Vc                  | vTn (AH) HV       | Ppa m              |
